# Supplementary material for: The risks of low hemoglobin deferral in a large retrospective cohort of plasmapheresis donors and the influence factors of return for a subsequent donation in China
Source: PeerJ. 2023 Mar 13;11:e14999. doi: 10.7717/peerj.14999 (PMC10019327; doi:10.7717/peerj.14999)
Supplement: Supplemental Information 1 [file peerj-11-14999-s001.xlsx]

## Sheet: Sheet1
Plasma collection station	Plasma donor	sex	Date of first donation	Date of LHD	age	Number of lifetime donation	Number of donation in the prior 12 months	Hb	Last donation date before LHD	Date of resumption of donation
1	1	Female	2015/3/31	2019/2/26	46	100	26	102	2019-02-11	2021-06-15
1	2	Female	2015-12-21	2018/7/4	46	65	26	102	2018-06-19	N/A
1	3	Female	2017/3/22	2019/7/12	46	59	25	100	2019-06-27	2019-07-26
1	4	Female	2017/5/16	2020/4/26	46	73	24	100	2020-04-10	2020-08-07
1	5	Female	2017/9/20	2018/9/20	46	27	26	<110	2018-09-05	2018-10-06
1	6	Female	2017/10/16	2019/10/3	46	45	23	99	2019-09-19	2019-10-17
1	7	Female	2019/6/12	2019/8/24	46	6	6	96	2019-08-10	N/A
2	8	Female	2018/4/24	2020/7/15	46	25	8	95	2020-01-09	NA
2	9	Female	2016/6/16	2020/5/14	46	22	0	103	2018-10-03	2020NA11NA9
2	10	Female	2019/4/10	2020/3/30	46	2	2	105	2019-04-25	NA
2	11	Female	2019/3/13	2020/3/5	46	2	2	102	2019-03-31	NA
3	12	Female	2006/11/1	2018/3/29	46	107	25	102	2018-03-13	NA
3	13	Female	2017/11/24	2018/5/25	46	9	9	100	2018-04-29	2018-09-06
3	14	Female	2018/3/14	2019/1/12	46	22	22	104	2018-12-27	2020-10-02
3	15	Female	2014/12/2	2019/3/21	46	27	0	104	2017-07-17	2020-04-03
3	16	Female	2017/3/19	2019/4/26	46	55	26	104	2019-04-11	2019-07-04
3	17	Female	2018/10/4	2019/5/30	46	16	16	103	2019-05-15	/
3	18	Female	2019/1/6	2019/5/30	46	8	8	107	2019-05-06	/
3	19	Female	2017/8/14	2019/6/7	46	45	25	103	2019-05-23	2020-01-03
3	20	Female	2006/5/23	2019/6/7	46	35	19	102	2019-05-23	2020-07-30
3	21	Female	2015/6/9	2019/12/6	46	2	0	89	2015-06-23	/
3	22	Female	2018/3/26	2020/8/14	46	60	24	104	2020-07-30	/
3	23	Female	2019/11/21	2020/12/11	46	23	22	105	2020-11-27	2021-01-22
3	24	Female	2018/7/5	2020/8/12	46	10	0	100	2018-12-08	/
3	25	Female	2018/7/2	2020/6/22	46	4	0	101	2018-08-29	2021-05-13
4	26	Female	2012/7/9	2018/6/3	46	131	25	105	2018-05-17	2018-06-18
4	27	Female	2014/11/6	2020/9/15	46	48	19	106	2020-08-31
4	28	Female	2011/9/22	2020/9/18	46	209	23	105	2020-09-03
4	29	Female	2020/4/14	2020/11/5	46	14	14	106	2020-10-16	2020-11-20
4	30	Female	2018/4/20	2020/11/16	46	49	19	104	2020-11-01	2020-11-29
5	31	Female	2014/3/24	2018/5/10	46	52	19	102	2018-04-25	/
5	32	Female	2018/5/22	2018/12/21	46	9	9	105	2018-12-06	2019-01-11
5	33	Female	2018/5/15	2019/10/10	46	2	0	102	2018-06-02	/
5	34	Female	2011/11/20	2019/12/10	46	10	2	106	2019-05-31	/
5	35	Female	2017/11/29	2020/10/29	46	9	0	98	2018-03-21	/
5	36	Female	2014/8/13	2020/11/11	46	42	13	103	2020-10-26	/
6	37	Female	1997/6/16	2018/2/1	46	96	23	95	2018-01-17	N/A
6	38	Female	2001/10/12	2018/4/4	46	84	26	100	2018-03-19	2018-04-18
6	39	Female	1999/12/30	2018/4/4	46	98	26	95	2018-03-16	2018-05-19
6	40	Female	2017/2/20	2018/4/20	46	25	23	100	2018-04-05	N/A
6	41	Female	1998/1/4	2018/5/21	46	112	25	100	2018-05-04	2018-06-04
6	42	Female	2002/6/11	2018/7/13	46	80	18	95	2018-06-28	N/A
6	43	Female	2016/3/21	2018/7/13	46	50	26	92	2018-06-28	2018-10-17
6	44	Female	2018/6/28	2018/7/19	46	2	2	95	2018-06-28	N/A
6	45	Female	2018/6/11	2018/8/16	46	4	4	95	2018-07-30	N/A
6	46	Female	2018/9/26	2018/10/12	46	2	2	102	2018-09-26	N/A
6	47	Female	2005/3/21	2018/12/24	46	83	21	100	2018-12-08	2019-01-07
6	48	Male	2000/4/27	2019/1/2	46	125	26	110	2018-12-11	2019-03-28
6	49	Female	2019/1/11	2019/2/12	46	3	3	90	2019-01-25	2019-02-26
6	50	Female	2019/4/10	2019/6/28	46	6	6	100	2019-06-10	N/A
6	51	Female	2000/11/3	2019/7/8	46	130	21	102	2019-06-22	2019-08-15
6	52	Female	2016/10/11	2019/7/8	46	54	12	100	2019-06-22	2019-12-30
6	53	Female	2002/8/5	2019/7/29	46	140	25	95	2019-07-14	2019-08-14
6	54	Female	2018/6/8	2019/7/29	46	28	24	100	2019-07-10	2019-10-20
6	55	Female	2015/5/5	2019/11/20	46	101	23	99	2019-11-05	N/A
6	56	Female	2018/11/14	2019/12/5	46	26	24	90	2019-11-20	N/A
6	57	Female	2015/4/15	2020/7/2	46	1	0	<110	2015-04-15	N/A
6	58	Female	2012/10/24	2020/9/21	46	1	0	<110	2012-10-24	N/A
7	59	Female	2013/4/5	2018/1/4	46	10	0	101	2013-08-12	/
7	60	Female	2013/1/14	2018/2/11	46	59	12	103	2017-08-01	/
7	61	Female	2012/12/5	2018/2/15	46	104	7	103	2017-07-06	/
7	62	Female	2008/1/31	2018/5/16	46	10	0	102	2008-09-17	/
7	63	Female	2014/1/6	2018/5/21	46	44	0	101	2016-10-31	2018-11-07
7	64	Female	2011/4/22	2018/5/24	46	112	4	103	2017-09-20	2018-11-26
7	65	Female	2012/6/12	2018/6/21	46	2	0	104	2014-11-24	2019-11-22
7	66	Female	2011/9/12	2018/7/4	46	128	11	103	2017-12-04	2020-11-24
7	67	Female	2011/12/30	2018/7/20	46	78	0	101	2016-09-19	/
7	68	Female	2016/10/14	2018/12/21	46	1	0	100	2016-10-14	/
7	69	Female	2013/7/2	2019/1/15	46	6	0	101	2014-01-24	2019-10-16
7	70	Female	2018/1/14	2019/3/15	46	2	1	101	2018-08-24	/
7	71	Female	2017/6/1	2019/3/27	46	13	3	101	2018-07-12	/
7	72	Female	2014/5/1	2019/4/23	46	1	0	101	2014-05-01	/
7	73	Female	2016/9/29	2019/5/3	46	32	0	101	2018-02-04	/
7	74	Female	2009/7/13	2019/5/12	46	1	0	100	2009-07-13	2019-09-18
7	75	Male	2014/11/17	2019/5/27	46	43	13	114	2019-05-12	/
7	76	Female	2015/3/19	2019/9/12	46	7	0	100	2015-11-24	/
7	77	Female	2015/8/26	2020/3/24	46	60	0	101	2019-01-15	/
7	78	Female	2012/3/1	2020/6/2	46	124	0	100	2018-01-13	2020-09-11
7	79	Female	2018/9/6	2020/6/29	46	2	0	102	2018-11-12	/
7	80	Female	2011/11/11	2020/7/22	46	163	9	100	2020-01-13	/
7	81	Female	2011/8/10	2020/7/26	46	182	22	100	2020-07-12	/
7	82	Female	2015/4/2	2020/9/17	46	88	2	100	2020-01-05	/
7	83	Female	2015/5/29	2020/9/22	46	110	9	102	2020-01-17	/
7	84	Female	2015/11/13	2020/9/27	46	1	0	100	2015-11-13	/
7	85	Female	2013/8/8	2020/11/20	46	21	0	100	2014-06-12	/
7	86	Female	2013/12/26	2020/11/20	46	8	0	100	2018-03-06	/
7	87	Female	2015/4/7	2020/11/26	46	117	3	101	2020-01-05	/
7	88	Female	2017/1/25	2020/11/26	46	0	0	100	/	/
7	89	Female	2015/5/29	2020/12/27	46	110	2	101	2020-01-17	/
7	90	Female	2011/8/10	2020/10/2	46	182	18	101	2020-07-26	2020-11-25
7	91	Female	2011/11/11	2020/10/28	46	163	6	102	2020-01-13	/
7	92	Female	2015/3/19	2020/12/13	46	6	0	100	2015-11-24	/
7	93	Female	2013/7/2	2020/12/3	46	6	0	100	2014-01-24	/
8	94	Male	2016/12/27	2018/3/20	46	20	15	95	2018-02-26	2018-06-18
8	95	Female	2017/10/24	2018/5/31	46	8	8	105	2018-05-03	NA
8	96	Female	2016/8/5	2018/12/5	46	6	0	86	2017-02-07	NA
8	97	Female	2018/5/7	2019/2/13	46	17	17	103	2019-01-28	2019-08-20
8	98	Female	2018/1/4	2019/3/7	46	9	4	95	2019-02-18	2019-03-27
8	99	Female	2019/1/10	2019/3/27	46	4	4	106	2019-02-21	2019-04-11
8	100	Female	2018/7/2	2019/3/28	46	19	19	105	2019-03-14	2019-04-11
8	101	Female	2019/3/20	2019/4/3	46	2	2	107	2019-03-20	NA
8	102	Female	2018/10/15	2019/4/10	46	12	12	104	2019-03-26	NA
8	103	Female	2018/3/7	2019/4/12	46	13	13	107	2019-03-08	NA
8	104	Female	2019/3/20	2019/4/18	46	2	2	92	2019-04-03	NA
8	105	Female	2018/8/29	2019/4/23	46	12	12	107	2019-04-08	NA
8	106	Female	2016/9/19	2019/4/23	46	46	24	106	2019-04-09	2019-06-12
8	107	Female	2018/10/15	2019/4/25	46	12	12	103	2019-04-09	NA
8	108	Female	2018/7/31	2019/4/26	46	17	17	105	2019-04-04	2019-05-13
8	109	Female	2015/12/16	2019/5/21	46	1	0	85	2015-12-16	NA
8	110	Female	2018/9/20	2019/5/30	46	5	5	97	2019-05-13	NA
8	111	Female	2015/12/16	2019/6/4	46	1	0	88	2015-12-16	NA
8	112	Female	2016/7/14	2019/6/11	46	73	25	105	2019-05-27	2019-06-25
8	113	Female	2017/10/19	2019/6/13	46	8	2	84	2018-09-13	NA
8	114	Female	2017/3/17	2019/6/17	46	4	0	83	2017-06-13	NA
8	115	Female	2017/10/25	2019/6/20	46	13	7	105	2019-06-05	2019-07-04
8	116	Female	2018/12/6	2019/6/26	46	16	16	106	2019-06-12	2019-07-10
8	117	Female	2018/8/6	2019/7/9	46	2	2	88	2018-08-16	NA
8	118	Female	2017/4/28	2019/7/10	46	44	21	107	2019-06-25	NA
8	119	Female	2016/5/17	2019/8/8	46	7	0	104	2016-11-14	2020-08-13
8	120	Female	2018/1/4	2019/11/22	46	9	4	96	2019-03-27	NA
8	121	Female	2016/5/13	2019/11/27	46	5	0	84	2016-09-09	NA
8	122	Female	2017/4/4	2020/1/6	46	1	0	＜110	2017-04-04	NA
8	123	Female	2018/1/4	2020/1/17	46	9	3	＜110	2019-03-27	NA
8	124	Female	2018/5/17	2020/1/23	46	1	1	＜110	2018-05-17	NA
8	125	Female	2016/7/20	2020/3/20	46	5	1	＜110	2019-04-09	NA
8	126	Female	2019/4/19	2020/5/20	46	34	13	＜110	2020-04-28	NA
8	127	Female	2019/12/31	2020/6/30	46	6	6	＜110	2020-05-19	NA
8	128	Female	2019/12/31	2020/7/17	46	6	6	＜110	2020-06-29	NA
8	129	Female	2020/6/4	2020/7/17	46	4	4	＜110	2020-07-03	2020-08-03
8	130	Female	NA	2020/8/7	46	NA	NA	＜110	NA	NA
8	131	Female	2018/9/12	2020/8/11	46	46	23	＜110	2020-07-27	NA
8	132	Female	2018/5/29	2020/8/13	46	13	0	＜110	2019-07-26	NA
8	133	Female	2017/9/28	2020/8/21	46	3	0	＜110	2017-12-15	NA
8	134	Female	2018/9/12	2020/8/26	46	46	23	＜110	2020-08-11	NA
8	135	Female	2018/8/1	2020/8/29	46	2	0	＜110	2018-09-18	NA
8	136	Female	2017/9/27	2020/9/25	46	34	22	＜110	2020-05-19	NA
8	137	Female	2018/9/12	2020/9/30	46	46	20	＜110	2020-08-11	NA
8	138	Female	2016/2/24	2020/10/7	46	2	0	＜110	2017-02-10	NA
8	139	Female	2016/9/19	2020/10/12	46	80	25	＜110	2020-09-28	2021-03-01
8	140	Female	2016/7/14	2020/10/12	46	106	25	＜110	2020-09-28	NA
8	141	Female	2020/7/23	2020/10/19	46	5	5	＜110	2020-09-30	NA
8	142	Female	2020/6/16	2020/10/20	46	6	6	＜110	2020-09-28	NA
8	143	Female	2018/4/25	2020/10/23	46	55	23	＜110	2020-10-08	NA
8	144	Female	2020/5/8	2020/10/26	46	4	4	＜110	2020-09-11	NA
8	145	Female	2016/11/25	2020/11/2	46	3	0	＜110	2016-12-26	NA
8	146	Female	2018/4/25	2020/11/7	46	55	22	＜110	2020-10-22	NA
8	147	Female	2020/6/3	2020/11/14	46	9	9	＜110	2020-10-29	2021-03-03
8	148	Female	2017/11/28	2020/11/14	46	23	20	＜110	2020-10-30	NA
8	149	Female	2017/11/28	2020/11/28	46	23	19	＜110	2020-11-14	NA
8	150	Female	2016/7/14	2020/11/30	46	106	21	＜110	2020-10-12	NA
8	151	Female	2017/12/29	2020/11/30	46	13	4	＜110	2020-03-31	2021-04-15
8	152	Female	2018/1/9	2020/12/4	46	71	23	＜110	2020-11-20	2020-12-18
8	153	Female	2019/7/8	2020/12/4	46	27	18	＜110	2020-11-14	2020-12-22
8	154	Female	2019/6/27	2020/12/16	46	33	21	＜110	2020-12-02	NA
8	155	Female	2018/7/19	2020/12/26	46	43	18	＜110	2020-12-12	NA
9	156	Female	2014/1/13	2018/3/5	46	40	0	92	2017-01-05	NA
9	157	Female	2018/6/13	2018/6/28	46	2	2	100	2018-06-13	NA
9	158	Female	2014/1/1	2018/7/23	46	103	21	100	2018-07-08	NA
9	159	Female	2015/10/22	2018/8/1	46	9	5	98	2017-08-29	NA
9	160	Female	2013/5/3	2018/9/2	46	1	0	98	2013-05-03	NA
9	161	Female	2018/1/7	2018/10/3	46	3	3	93	2018-02-04	NA
9	162	Female	2014/1/13	2019/1/31	46	71	8	90	2018-05-24	2019-12-06
9	163	Female	2014/5/13	2019/3/18	46	24	1	90	2018-06-10	NA
9	164	Female	2015/6/4	2019/4/10	46	62	0	93	2018-03-21	2019-10-15
9	165	Female	2011/1/18	2019/4/11	46	1	0	94	2011-01-18	2020-04-14
9	166	Female	2017/11/17	2019/9/29	46	1	0	90	2017-11-17	NA
9	167	Female	2018/11/22	2019/10/22	46	1	1	92	2018-11-22	2020-09-24
9	168	Female	2012/7/11	2019/10/27	46	1	0	92	2012-07-11	NA
9	169	Female	2015/3/17	2019/10/29	46	1	0	88	2015-03-17	NA
9	170	Female	2013/1/25	2019/12/25	46	1	0	92	2013-01-25	NA
9	171	Female	2018/4/26	2020/1/6	46	21	6	83	2019-06-20	NA
9	172	Female	2014/10/13	2020/1/9	46	96	0	94	2018-08-24	NA
9	173	Female	2018/9/12	2020/1/19	46	3	0	96	2018-10-10	NA
9	174	Female	2017/10/15	2020/3/22	46	37	0	90	2019-03-14	NA
9	175	Female	2014/1/6	2020/3/27	46	149	23	98	2020-03-12	2020-08-06
9	176	Female	2017/9/10	2020/3/31	46	35	1	90	2019-04-05	NA
9	177	Female	2010/10/25	2020/4/10	46	1	0	75	2010-10-25	NA
9	178	Female	2019/5/27	2020/5/12	46	7	7	79	2019-09-30	NA
9	179	Female	2014/1/13	2020/6/1	46	82	11	98	2020-05-17	NA
9	180	Female	/	2020/6/19	46	0	0	93	/	2020-08-30
9	181	Female	2019/3/20	2020/6/19	46	1	0	95	2020-03-20	NA
9	182	Female	2018/1/28	2020/6/30	46	42	9	85	2019-10-24	NA
9	183	Female	2014/1/13	2020/7/1	46	144	3	92	2020-06-16	2021-01-21
9	184	Female	2017/4/11	2020/7/14	46	25	23	99	2020-06-29	2020-10-05
9	185	Female	2015/12/22	2020/7/16	46	1	0	85	2015-12-22	NA
9	186	Female	/	2020/7/16	46	0	0	89	/	NA
9	187	Female	2016/10/24	2020/7/17	46	22	0	93	2018-10-03	NA
9	188	Female	2011/10/19	2020/8/5	46	5	4	90	2020-07-08	NA
9	189	Female	2016/8/4	2020/8/7	46	101	23	96	2020-07-23	NA
9	190	Female	2018/10/22	2020/8/7	46	22	23	92	2020-07-23	NA
9	191	Female	2014/1/29	2020/8/28	46	90	13	85	2020-06-25	2021-02-16
9	192	Female	2017/11/12	2020/9/4	46	10	1	82	2020-01-14	NA
9	193	Female	2016/3/24	2020/9/8	46	6	0	90	2018-06-17	NA
9	194	Female	2017/11/22	2020/9/9	46	70	24	90	2020-08-25	2021-05-10
9	195	Female	2014/8/15	2020/9/11	46	3	0	92	2018-11-23	NA
9	196	Female	2020/6/8	2020/10/8	46	9	9	89	2020-09-21	NA
9	197	Male	2018/2/2	2020/10/15	46	69	24	95	2020-09-30	NA
9	198	Female	2017/10/23	2020/10/23	46	4	0	90	2017-12-07	NA
9	199	Male	2017/10/31	2020/10/27	46	7	0	97	2018-02-01	NA
9	200	Female	/	2020/11/3	46	0	0	93	/	NA
9	201	Female	2019/2/26	2020/11/6	46	7	0	90	2019-05-21	NA
9	202	Female	2017/3/14	2020/11/6	46	53	2	90	2019-12-29	NA
9	203	Female	2015/6/8	2020/11/6	46	4	0	88	2015-12-22	NA
9	204	Female	2019/9/27	2020/11/22	46	22	18	98	2020-11-02	NA
9	205	Female	2018/1/5	2020/11/25	46	24	0	89	2019-01-24	NA
9	206	Female	/	2020/12/1	46	0	0	89	/	NA
10	207	Female	2010/4/4	2018/2/28	46	77	0	<110g/L	2015-11-05	/
10	208	Male	2015/9/18	2018/3/7	46	8	1	<120g/L	2017-06-30	2018-04-13
10	209	Female	/	2018/3/19	46	0	0	<110g/L	/	/
10	210	Female	/	2018/03/019	46	0	0	<110g/L	/	/
10	211	Female	/	2018/4/18	46	0	0	<110g/L	/	/
10	212	Female	/	2018/6/15	46	0	0	<110g/L	/	/
10	213	Female	2016/5/10	2018/6/28	46	20	4	<110g/L	2017-11-18	/
10	214	Female	/	2018/7/25	46	0	0	<110g/L	/	/
10	215	Female	/	2018/7/30	46	0	0	<110g/L	/	/
10	216	Female	2012/9/10	2018/8/7	46	29	6	<110g/L	2018-02-07	/
10	217	Female	2018/8/20	2018/8/20	46	0	0	<110g/L	/	2018-11-10
10	218	Female	2017/3/3	2018/9/4	46	4	2	<110g/L	2017-12-19	/
10	219	Female	/	2018/9/6	46	0	0	<110g/L	/	2019-01-11
10	220	Female	2012/8/3	2018/10/24	46	84	26	<110g/L	2018-01-31	2018-11-21
10	221	Female	/	2018/12/7	46	0	0	<110g/L	/	/
10	222	Female	/	2018/12/8	46	0	0	<110g/L	/	/
10	223	Female	2017/5/29	2019/3/20	46	7	1	<110g/L	2018-05-26	/
10	224	Female	/	2019/3/27	46	0	0	<110g/L	/	/
10	225	Female	/	2019/4/13	46	0	0	<110g/L	/	/
10	226	Female	/	2019/5/13	46	0	0	<110g/L	/	/
10	227	Female	/	2019/5/17	46	0	0	<110g/L	/	/
10	228	Female	/	2019/5/29	46	0	0	<110g/L	/	2020-11-11
10	229	Female	2018/7/24	2019/8/5	46	4	2	<110g/L	2018-08-22	/
10	230	Female	/	2019/8/23	46	0	0	<110g/L	/	/
10	231	Female	/	2019/8/26	46	0	0	<110g/L	/	/
10	232	Female	/	2019/8/30	46	0	0	<110g/L	/	/
10	233	Female	2017/4/28	2019/9/6	46	20	12	<110g/L	2018-05-17	/
10	234	Female	/	2019/10/2	46	0	0	<110g/L	/	2020-04-02
10	235	Female	/	2019/10/12	46	0	0	<110g/L	/	/
10	236	Female	2010/1/5	2019/11/4	46	7	0	<110g/L	2010-04-09	/
10	237	Female	/	2019/11/12	46	0	0	<110g/L	/	/
10	238	Female	2010/1/26	2019/11/19	46	3	0	<110g/L	2010-03-19	/
10	239	Female	2017/3/17	2019/12/18	46	24	0	<110g/L	2019-05-17	/
10	240	Male	2019/3/7	2020/3/9	46	5	5	<120g/L	2019-04-18	/
10	241	Female	/	2020/3/17	46	0	0	<110g/L	/	/
10	242	Female	2019/10/9	2020/3/18	46	2	2	<110g/L	2020-09-18	/
10	243	Male	2014/4/14	2020/4/3	46	69	6	<120g/L	2019-09-25	2020-11-21
10	244	Female	2010/7/18	2020/4/6	46	58	0	<110g/L	2017-04-01	/
10	245	Female	2013/8/9	2020/4/7	46	33	0	<110g/L	2015-09-23	/
10	246	Female	/	2020/4/8	46	0	0	<110g/L	/	/
10	247	Male	/	2020/4/13	46	0	0	<120g/L	/	/
10	248	Female	2019/6/21	2020/4/14	46	17	17	<110g/L	2020-03-31	/
10	249	Male	/	2020/4/16	46	7	0	<120g/L	/	2020-08-03
10	250	Female	/	2020/4/18	46	0	0	<110g/L	/	/
10	251	Female	/	2020/4/29	46	0	0	<110g/L	/	/
10	252	Female	/	2020/4/29	46	0	0	<110g/L	/	/
10	253	Female	/	2020/5/1	46	0	0	<110g/L	/	/
10	254	Female	2012/9/6	2020/5/4	46	67	9	<110g/L	2019-11-02	2021-01-07
10	255	Female	/	2020/5/11	46	/	/	<110g/L	/	/
10	256	Female	2020/4/21	2020/5/13	46	2	2	<110g/L	2020-04-21	2020-09-21
10	257	Female	/	2020/5/18	46	0	0	<110g/L	/	/
10	258	Female	2011/7/13	2020/5/26	46	99	3	<110g/L	2019-11-19	2020-10-12
10	259	Female	2018/9/18	2020/6/3	46	4	1	<110g/L	2019-08-23	/
10	260	Female	2013/10/17	2020/6/4	46	151	/	<110g/L	2020-05-21	2020-09-03
10	261	Female	2019/5/8	2020/6/9	46	9	6	<110g/L	2019-11-16	/
10	262	Female	2020/4/22	2020/6/9	46	3	2	<110g/L	2020-05-26	/
10	263	Female	/	2020/6/12	46	0	0	<110g/L	/	/
10	264	Female	2014/8/9	2020/6/13	46	4	0	<110g/L	2015-03-05	/
10	265	Female	/	2020/6/15	46	2	2	<110g/L	/	2020-07-23
10	266	Female	/	2020/7/22	46	0	0	<110g/L	/	/
10	267	Female	/	2020/7/22	46	0	0	<110g/L	2020-06-19	/
10	268	Female	2017/2/17	2020/7/25	46	15	2	<110g/L	/	/
10	269	Female	2011/11/8	2020/8/10	46	26	2	<110g/L	2020-07-14	2020-10-30
10	270	Female	2012/9/6	2020/8/17	46	67	9	<110g/L	2019-11-02	2021-01-07
10	271	Female	/	2020/8/19	46	0	0	<110g/L	/	/
10	272	Female	2010/8/20	2020/8/20	46	216	19	<110g/L	2020-07-24	2021-03-15
10	273	Female	/	2020/8/20	46	0	0	<110g/L	/	2021-05-06
10	274	Female	/	2020/9/25	46	0	0	<110g/L	/	/
10	275	Female	2015/1/5	2020/9/30	46	62	1	<110g/L	2019-12-25	/
10	276	Female	/	2020/10/13	46	0	0	<110g/L	/	/
10	277	Male	2017/6/26	2020/10/14	46	73	21	<120g/L	2020-09-02	2021-01-11
10	278	Female	/	2020/10/22	46	0	0	<110g/L	/	2021-11-19
10	279	Female	2016/11/26	2020/11/3	46	39	3	<110g/L	2020-06-29	/
10	280	Female	/	2020/11/11	46	0	0	<110g/L	/	/
10	281	Female	/	2020/11/16	46	0	0	<110g/L	/	/
10	282	Female	2012/5/14	2020/11/19	46	196	/	<110g/L	2020-11-05	2020-12-17
10	283	Female	/	2020/11/27	46	0	0	<110g/L	/	/
10	284	Female	/	2020/12/1	46	0	0	<110g/L	/	/
10	285	Male	/	2020/12/14	46	0	0	<120g/L	/	/
11	286	Female	2014/1/15	2018/1/18	46	2	0	/	2014-04-12	/
11	287	Female	2018/1/23	2018/1/23	46	0	0	/	/	2019-08-13
11	288	Female	2017/12/14	2018/2/8	46	4	4	/	2018-01-25	/
11	289	Female	2018/2/8	2018/2/8	46	0	0	/	/	2020-01-07
11	290	Female	2014/4/4	2018/2/10	46	51	3	/	2017-05-03	/
11	291	Female	2012/11/20	2018/2/24	46	4	0	/	2013-01-16	/
11	292	Female	2013/8/17	2018/3/1	46	9	0	/	2014-02-20	2018-12-06
11	293	Female	2017/5/6	2018/3/6	46	15	15	/	2018-01-12	2018-06-16
11	294	Female	2015/2/10	2018/3/6	46	3	3	/	2015-07-07	2018-11-29
11	295	Female	2015/2/11	2018/3/6	46	4	0	/	2016-03-09	/
11	296	Female	2015/7/1	2018/3/13	46	21	4	/	2017-11-15	/
11	297	Female	2012/8/7	2018/4/10	46	7	3	/	2017-12-28	2018-11-15
11	298	Female	2017/12/28	2018/4/24	46	3	3	/	2018-01-25	/
11	299	Male	2013/11/20	2018/5/4	46	60	18	/	2018-04-06	/
11	300	Female	2015/12/2	2018/5/18	46	25	6	/	2018-01-27	2018-08-21
11	301	Female	2012/12/25	2018/5/29	46	36	0	/	2016-07-29	/
11	302	Female	2018/5/30	2018/5/30	46	0	0	/	/	2019-06-19
11	303	Female	2015/6/17	2018/6/22	46	12	0	/	2016-06-14	/
11	304	Female	2015/7/1	2018/7/12	46	21	4	/	2017-11-15	/
11	305	Female	2013/8/8	2018/7/17	46	21	13	/	2018-02-24	2019-01-19
11	306	Female	2018/7/27	2018/7/27	46	0	0	/	/	2019-09-12
11	307	Female	2018/8/11	2018/8/11	46	0	0	/	/	2020-10-28
11	308	Female	2018/1/11	2018/8/23	46	12	12	/	2018-08-09	/
11	309	Female	2016/9/21	2018/9/19	46	11	6	/	2018-05-18	2019-04-27
11	310	Female	2018/2/10	2018/9/19	46	2	2	/	2018-02-24	2019-01-31
11	311	Female	2012/10/3	2018/9/19	46	89	0	/	2016-07-27	/
11	312	Female	2012/11/23	2018/9/27	46	4	0	/	2016-09-01	/
11	313	Female	2012/9/15	2018/10/18	46	18	6	/	2018-06-05	2019-04-17
11	314	Female	2018/1/4	2018/10/30	46	18	18	/	2018-10-16	/
11	315	Female	2014/6/6	2018/11/3	46	29	12	/	2018-10-20	/
11	316	Female	2016/12/1	2018/12/13	46	36	20	/	2018-11-29	/
11	317	Female	2018/1/11	2018/12/20	46	12	12	/	2018-08-09	/
11	318	Female	2019/1/31	2019/2/1	46	0	0	/	/	2020-03-05
11	319	Female	2013/1/4	2019/2/2	46	5	2	/	2018-02-23	/
11	320	Female	2016/12/1	2019/3/14	46	36	14	/	2018-11-29	/
11	321	Female	2017/5/2	2019/3/14	46	20	0	/	2018-03-13	/
11	322	Female	2021/1/26	2019/3/14	46	0	0	/	/	2021-01-26
11	323	Female	2014/2/26	2019/4/6	46	2	0	/	2016-01-07	/
11	324	Female	2019/4/10	2019/4/10	46	0	0	/	/	2020-12-12
11	325	Female	2017/2/16	2019/5/3	46	8	6	/	2019-04-18	2019-08-31
11	326	Female	2013/11/8	2019/5/8	46	2	0	/	2013-12-07	/
11	327	Female	2017/8/10	2019/5/10	46	0	0	/	/	2020-01-21
11	328	Female	2013/4/23	2019/5/21	46	8	0	/	2018-06-22	2021-09-06
11	329	Female	2012/7/25	2019/5/25	46	73	22	/	2019-05-11	/
11	330	Female	2017/3/7	2019/6/1	46	42	23	/	2019-05-01	/
11	331	Female	2018/1/17	2019/6/4	46	7	7	/	2019-01-19	/
11	332	Female	2013/12/7	2019/6/19	46	3	0	/	2016-02-23	/
11	333	Female	2012/6/16	2019/6/25	46	57	9	/	2019-06-11	/
11	334	Female	2013/6/18	2019/7/17	46	3	3	/	2019-06-13	2020-05-02
11	335	Female	2019/4/24	2019/9/6	46	0	0	/	/	2019-12-24
11	336	Female	2015/8/5	2019/9/18	46	7	7	/	2019-09-04	2020-01-03
11	337	Male	2014/8/2	2019/9/18	46	9	9	/	2019-09-04	2020-01-04
11	338	Female	2017/9/16	2019/9/26	46	2	0	/	2017-12-21	2021-04-07
11	339	Female	2016/1/22	2019/10/8	46	50	12	/	2019-09-11	2021-06-11
11	340	Female	2016/7/30	2019/10/10	46	61	18	/	2019-09-26	/
11	341	Female	2016/12/21	2019/10/25	46	19	2	/	2018-11-20	/
11	342	Female	2018/1/17	2019/10/26	46	7	4	/	2019-01-19	/
11	343	Female	2017/3/7	2019/11/1	46	42	13	/	2019-05-01	/
11	344	Female	2012/9/15	2019/11/7	46	12	0	/	2013-03-12	2020-03-25
11	345	Female	2014/3/13	2019/11/8	46	7	0	/	2018-09-15	/
11	346	Female	2017/8/16	2019/11/19	46	32	13	/	2019-10-11	/
11	347	Female	2017/4/4	2019/12/31	46	21	8	/	2019-12-05	2020-05-08
11	348	Female	2019/12/17	2019/12/31	46	1	1	/	2019-12-17	/
11	349	Female	2019/2/23	2020/1/8	46	1	1	/	2019-02-23	/
11	350	Female	2012/9/13	2020/1/18	46	90	7	/	2020-01-04	/
11	351	Female	2019/11/14	2020/3/5	46	5	5	/	2020-01-14	/
11	352	Female	2018/3/16	2020/4/10	46	6	0	/	2018-07-11	/
11	353	Male	2013/6/22	2020/5/5	46	162	16	/	2020-04-02	/
11	354	Female	2019/8/30	2020/5/7	46	8	8	/	2019-12-26	/
11	355	Female	2016/6/7	2020/5/14	46	78	16	/	2020-04-21	/
11	356	Female	2016/1/15	2020/5/15	46	4	0	/	2016-07-19	2021-03-12
11	357	Female	2018/7/3	2020/5/16	46	26	16	/	2020-05-02	/
11	358	Female	2015/5/27	2020/7/23	46	33	5	/	2020-06-25	2020-12-01
11	359	Female	2020/7/14	2020/7/28	46	0	0	/	/	2020-07-14
11	360	Female	2020/4/28	2020/8/19	46	8	8	/	2020-08-05	/
11	361	Female	2015/2/7	2020/9/4	46	2	1	/	2020-08-18	/
11	362	Female	2015/5/30	2020/10/17	46	49	9	/	2020-09-23	/
11	363	Female	2017/8/30	2020/10/23	46	17	12	/	2020-10-09	/
11	364	Male	2015/7/8	2020/10/27	46	123	22	/	2020-10-13	/
11	365	Female	2019/1/31	2020/11/13	46	1	1	/	2020-03-05	/
11	366	Female	2019/11/21	2020/12/26	46	9	7	/	2020-09-26	/
12	367	Female	2020/11/11	2020-11-11	46	0	0	＜110	NA	NA
12	368	Female	2020/10/17	2020-10-17	46	0	0	＜110	NA	NA
12	369	Male	2019/2/15	2019-09-25	46	4	4	＜120	20190403	NA
12	370	Female	2020/9/8	2020-09-08	46	0	0	＜110	NA	NA
12	371	Female	2017/2/22	2020-06-29	46	20	7	＜110	20190902	NA
12	372	Female	2018/5/16	2020-06-25	46	22	5	＜110	20191022	NA
13	373	Female	2016/10/11	2018/1/17	46	30	24	87	2018-01-03	2018-09-19
13	374	Female	2017/12/29	2018/2/9	46	3	3	88	2018-01-26	2019-01-15
13	375	Female	2012/11/30	2018/3/8	46	100	20	79	2018-02-22	2018-06-13
13	376	Female	2014/3/6	2018/3/17	46	96	21	110	2018-03-02	/
13	377	Female	2013/9/18	2018/3/28	46	7	1	90	2017-11-28	2018-07-04
13	378	Female	2013/5/9	2018/4/18	46	76	15	89	2018-03-30	/
13	379	Female	2013/10/11	2018/9/8	46	5	0	<110	2016-11-02	/
13	380	Female	2016/7/9	2018/10/31	46	20	10	86	2018-09-19	2019-02-22
13	381	Female	2017/9/15	2018/11/24	46	4	3	79	2018-11-07	/
13	382	Female	2016/9/1	2018-12-17	46	5	3	<110	2017-12-14	/
13	383	Female	2012/12/7	2019/1/3	46	109	15	86	2018-12-20	2020-12-29
13	384	Female	2012/11/21	2019/2/13	46	142	21	78	2019-01-30	/
13	385	Female	2019/1/12	2019/2/13	46	2	2	74	2019-01-26	/
13	386	Female	2018/3/29	2019/3/27	46	20	20	74	2019-03-13	/
13	387	Female	2012/3/15	2019/8/15	46	49	1	<110	2018-12-07	/
13	388	Female	2019/3/6	2019/9/12	46	6	6	84	2018-06-07	/
13	389	Female	2013/3/27	2019/9/187	46	67	0	<110	2016-04-12	/
13	390	Female	2019/12/26	2020/1/9	46	1	1	70	2019-12-26	/
13	391	Female	2015/3/24	2020/4/2	46	52	14	97	2020-03-19	/
13	392	Female	2019/1/18	2020/4/3	46	7	3	<110	2019-06-11	/
13	393	Female	2014/11/20	2020/4/4	46	56	17	92	2020-01-14	/
13	394	Female	2019/6/19	2020/5/6	46	2	2	<110	2019-07-16	/
13	395	Female	2017/7/15	2020/5/22	46	1	0	<110	2017-07-15	/
13	396	Female	2013/1/23	2020/6/6	46	173	22	96	2020-05-28	2020-10-01
13	397	Female	2012/3/15	2020/6/19	46	50	1	100	2020-05-27	/
13	398	Female	2016/9/16	2020/6/23	46	49	8	108	2020-05-26	/
13	399	Female	2012/3/27	2020/7/4	46	28	0	<110	2014-02-18	/
13	400	Female	2016/12/10	2020/7/24	46	41	11	103	2020-05-02	/
13	401	Female	2018/10/18	2020/7/25	46	42	23	100	2020-07-11	/
13	402	Female	2016/9/3	2020/7/29	46	42	21	105	2020-07-15	/
13	403	Female	2018/3/27	2020/8/11	46	5	0	<110	2018-06-14	/
13	404	Female	2014/12/27	2020/9/19	46	25	1	100	2020-09-03	/
13	405	Female	2019/6/4	2020/11/3	46	27	17	103	2020-10-16	/
13	406	Female	2018/5/5	2020-12-12	46	34	14	78	2020-11-28	/
14	407	Female	/	2019/1/12	46	/	/	＜110g/l	/	/
14	408	Female	/	2019/2/21	46	/	/	＜110g/l	/	/
14	409	Female	/	2019/5/25	46	/	/	＜110g/l	/	/
14	410	Female	2012/11/2	2019/3/22	46	83	/	＜110g/l	2017-07-27	/
14	411	Female	2018/5/23	2019/4/4	46	19	19	＜110g/l	2019-02-21	/
14	412	Female	/	2019/4/10	46	/	/	＜110g/l	/	/
14	413	Female	/	2019/4/15	46	/	/	＜110g/l	/	/
14	414	Female	/	2019/4/18	46	/	/	＜110g/l	/	/
14	415	Female	/	2019/5/16	46	/	/	＜110g/l	/	/
14	416	Female	/	2020/5/14	46	/	/	＜110g/l	/	/
14	417	Female	/	2020/11/14	46	/	/	＜110g/l	/	/
14	418	Female	/	2019/5/14	46	/	/	＜110g/l	/	/
14	419	Female	2010/5/26	2019/5/16	46	1	/	＜110g/l	2010-05-26	/
14	420	Female	2018/10/20	2019/6/1	46	4	4	＜110g/l	2018-12-15	2020-05-23
14	421	Female	/	2019/6/3	46	/	/	＜110g/l	/	/
14	422	Female	/	2019/6/6	46	/	/	＜110g/l	/	/
14	423	Female	/	2019/6/22	46	/	/	＜110g/l	/	/
14	424	Male	2019/7/10	2019/8/29	46	3	3	＜120g/l	2019-08-12	/
14	425	Female	/	2019/9/23	46	/	/	＜110g/l	/	/
14	426	Female	/	2019/9/23	46	/	/	＜110g/l	/	/
14	427	Female	/	2019/10/21	46	/	/	＜110g/l	/	/
14	428	Female	/	2019/11/14	46	/	/	＜110g/l	/	/
14	429	Female	2011/11/24	2019/12/9	46	23	/	＜110g/l	2012-10-27	/
14	430	Female	/	2020/3/19	46	/	/	＜110g/l	/	/
14	431	Female	/	2020/3/23	46	/	/	＜110g/l	/	/
14	432	Female	2020/11/16	2020/3/27	46	1	1	＜110g/l	/	2020-11-16
14	433	Female	/	2020/4/15	46	/	/	＜110g/l	/	/
14	434	Female	/	2020/5/4	46	/	/	＜110g/l	/	/
14	435	Female	2021/6/7	2020/5/25	46	/	/	＜110g/l	/	2021-06-07
14	436	Female	2019/6/3	2020/5/26	46	2	2	＜110g/l	2019-06-17	/
14	437	Female	2021/6/2	2020/6/3	46	/	/	＜110g/l	/	2021-06-02
14	438	Female	/	2020/6/9	46	/	/	＜110g/l	/	/
14	439	Female	/	2020/6/10	46	/	/	＜110g/l	/	/
14	440	Female	2019/11/4	2020/6/11	46	3	3	＜110g/l	2019-12-02	/
14	441	Female	/	2020/6/18	46	/	/	＜110g/l	/	/
14	442	Male	/	2020/6/29	46	/	/	＜120g/l	/	/
14	443	Female	/	2020/7/7	46	/	/	＜110g/l	/	/
14	444	Female	2018/8/21	2020/7/7	46	2	/	＜110g/l	2018-10-01	2021-01-19
14	445	Female	/	2020/7/18	46	/	/	＜110g/l	/	/
14	446	Female	/	2020/7/21	46	/	/	＜110g/l	/	/
14	447	Female	/	2020/7/21	46	/	/	＜110g/l	/	/
14	448	Female	/	2020/8/10	46	/	/	＜110g/l	/	/
14	449	Female	/	2020/8/11	46	/	/	＜110g/l	/	/
14	450	Female	/	2020/8/27	46	/	/	＜110g/l	/	/
14	451	Female	/	2020/9/25	46	/	/	＜110g/l	/	/
14	452	Female	/	2020/10/29	46	/	/	＜110g/l	/	/
14	453	Female	/	2020/11/18	46	/	/	＜110g/l	/	/
14	454	Female	2019/5/8	2020/11/23	46	7	1	＜110g/l	2019-12-30	/
14	455	Male	/	2020/12/21	46	/	/	＜120g/l	/	/
15	456	Female	2015/2/16	2018/2/15	46	60	26	<110g/L	2018-02-01	2018-06-21
15	457	Female	2017/10/18	2018/8/31	46	10	6	<110g/L	2018-08-01	2018-08-29
15	458	Female	2017/7/28	2018/9/3	46	22	19	<110g/L	2018-07-06	NA
15	459	Male	2016/1/26	2019/4/24	46	14	10	<120g/L	2019-04-10	NA
15	460	Female	2015/6/6	2020/8/25	46	12	1	<110g/L	2020-0315	2020-09-30
16	461	Female	2018/3/30	2018/6/29	46	8	8	101	2018-06-14	2018-08-09
16	462	Female	2018/7/19	2018/12/21	46	61	11	101	2018-12-06	2019-02-11
16	463	Female	2017/3/14	2018/12/19	46	36	19	103	2018-12-03
16	464	Female	2001/5/15	2018/2/1	46	163	15	89	2018-01-17	2018-07-23
16	465	Female	2013/9/12	2018/5/23	46	70	17	94	2018-05-04	2018-06-22
16	466	Female	2007/10/2	2019/7/2	46	4	0	101	2014-03-24
16	467	Female	2019/8/24	2019/10/24	46	5	5	102	2019-10-07
16	468	Male	2015/5/6	2019/6/14	46	23	0	110	2018-05-08
16	469	Female	2000/4/17	2019/10/18	46	17	0	98	2016-09-19
16	470	Female	2018/11/2	2020/11/6	46	4	0	100	2018-12-18
16	471	Female	2002/11/21	2020/11/30	46	0	0	100
16	472	Female	2017/2/10	2020/4/30	46	77	5	101	2020-04-15
16	473	Female	2001/12/14	2020/5/29	46	20	3	101	2020-05-14
16	474	Female	2017/7/13	2020/8/3	46	4	0	101	2017-08-29
16	475	Female	2010/4/30	2020/5/12	46	93	6	102	2020-04-24
16	476	Male	1999/10/27	2020/8/11	46	26	0	102	2019-12-24
16	477	Female	2018/11/16	2020/1/6	46	1	0	103	2018-11-16
16	478	Female	2019/2/16	2020/5/26	46	24	11	103	2020-05-11	2020-10-28
16	479	Female	2017/9/29	2020/3/19	46	13	2	105	2019-08-28	2020-11-02
16	480	Female	2015/9/25	2020/11/6	46	60	0	106	2019-11-04
16	481	Female	2018/9/25	2020/7/17	46	5	0	89	2018-11-20
16	482	Female	2018/10/29	2020/3/26	46	3	0	94	2018-11-27
16	483	Female	2018/9/11	2020/3/27	46	6	0	95	2018-11-27
16	484	Female	2014/10/24	2020/4/20	46	3	0	97	2014-11-21
17	485	Female	2013/11/7	2018/5/30	46	107	24	102	2018-05-15	NA
17	486	Female	NA	2018/7/19	46	NA	0	98	NA	NA
17	487	Female	2006/10/23	2018/7/30	46	5	0	57	2014-07-21	NA
17	488	Female	2013/4/2	2019/4/26	46	130	24	98	2019-04-11	NA
17	489	Female	2018/3/2	2019/5/4	46	2	0	91	2018-03-20	NA
17	490	Female	NA	2019/7/18	46	NA	NA	77	NA	NA
17	491	Female	NA	2019/12/31	46	NA	NA	84	NA	NA
17	492	Female	2018/1/17	2020/8/18	46	40	14	<110	2020-08-04	2020-10-04
17	493	Female	2020/5/31	2020/9/14	46	7	6	<110	2020-08-30	NA
17	494	Female	2017/10/12	2020/10/8	46	63	15	<110	2020-09-18	NA
17	495	Female	NA	2020/12/27	46	NA	NA	<110	NA	NA
