# Supplementary material for: The risks of low hemoglobin deferral in a large retrospective cohort of plasmapheresis donors and the influence factors of return for a subsequent donation in China
Source: PeerJ. 2023 Mar 13;11:e14999. doi: 10.7717/peerj.14999 (PMC10019327; doi:10.7717/peerj.14999)
Supplement: Supplemental Information 2 [file peerj-11-14999-s002.xlsx]

## Sheet: Sheet1
1 Statistics of plasma donors from 2018 to 2020
Rongsheng Monoclonal Plasma Co., Ltd						Shuyang Monoclonal Plasma Co., Ltd					Laishi Monoclonal Plasma Co., Ltd
Plasmapheresis donation	2018	2019	2020	Total		Plasmapheresis donation	Jiange	Cangxi	Total		Plasmapheresis donation	Shimen	Wuming	Lixian	Dahua	Total
Jianyang	12308	11874	12721	36903		2018	8849	8433	17282		2018	11303	2709	0	8624	22636
Zhongjiang	8368	8878	9659	26905		2019	8451	8727	17178		2019	8536	2161	4279	8919	23895
Anyue	12984	13602	14628	41214		2020	7759	8745	16504		2020	10352	2694	5018	9020	27084
Dujiangyan	6177	6719	7273	20169		Total	25059	25905	50964		Total	30191	7564	9297	26563	73615
Luojiang	8684	9237	10526	28447
Nanjiang	10511	11115	12269	33895
Quxian	9070	8927	9183	27180
Jintang	7289	7928	7848	23065
Shifang	10030	10545	10779	31354
Gaoxian	12562	13732	12188	38482
Nanbu	8624	9807	9814	28245
Renshou	12030	12441	12130	36601
Total	118637	124805	129018	372460

## Sheet: Sheet2
2.The rate of LHD in each company
Rongsheng Monoclonal Plasma Co., Ltd					Laishi Monoclonal Plasma Co., Ltd							Shuyang Monoclonal Plasma Co., Ltd
	Total	Number of LHD	Rate of LHD			Shimen	Wuming	Lixian	Dahua	Total			Jiange	Cangxi	Total
Jianyang	36903	24	0.0007		Total	30191	7564	9297	26563	73615		Total	25059	25905	50964
Zhongjiang	26905	11	0.0004		Number of LHD	79	5	49	6	139		Number of LHD	34	81	115
Anyue	41214	7	0.0002		Rate of LHD	0.0026	0.0007	0.0053	0.0002	0.0019		Rate of LHD	0.0014	0.0031	0.0023
Dujiangyan	20169	4	0.0002
Luojiang	28447	12	0.0004
Nanjiang	33895	2	0.0001
Quxian	27180	5	0.0002
Jintang	23065	6	0.0003
Shifang	31354	22	0.0007
Gaoxian	38482	35	0.0009
Nanbu	28245	62	0.0022
Renshou	36601	51	0.0014
Total	373460	241	0.0006

## Sheet: Sheet3
Age distribution of donors：
	Male					Female
	18-30	31-40	41-50	51-60		18-30	31-40	41-50	51-60
Shuyang	1772	2408	8611	8576		1140	2839	12847	12771
LHD	0	0	0	4		9	13	70	18
Laishi	4494	5785	8992	9396		1849	6576	16407	20116
LHD	2	1	5	4		4	18	81	23
Rongsheng	16808	19624	56335	40034		12172	27780	115462	84245
LHD	0	1	1	5		1	28	158	47
Total	23074	27817	73938	58006		15161	37195	144716	117132

## Sheet: Sheet4
Age distribution of LHD
	Male					Female
Age	18-30	31-40	41-50	51-60		18-30	31-40	41-50	51-60
LHD	2	2	7	12		14	59	310	89
No.donors	23074	27817	73938	58006		15161	37195	144716	117132
Rate of LHD	0.01	0.01	0.01	0.02		0.09	0.16	0.21	0.08

## Sheet: Sheet5
Monthly distribution
Times		Laishi	Rongsheng	Shuyang	Total
2017/12-2018/2		20499	60798	11634	92931
2018	3~5	19900	59471	10233	89604
	6~8	21120	63225	9692	94037
	9~11	20359	63768	9503	93630
2018/12-2019/2		21204	65235	11234	97673
2019	3~5	21302	62061	10018	93381
	6~8	22137	66057	10141	98335
	9~11	22576	68065	10172	100813
2019/12-2020/2		20164	70483	10244	100891
2020	3~5	23683	65483	9998	99164
	6~8	24020	72548	10595	107163
	9~11	24477	72376	10139	106992

## Sheet: Sheet6
Seasonal distribution
Season	Winter	Spring	Summer	Autumn
	92931	89604	94037	93630
	97673	93381	98335	100813
	100891	99164	107163	106992
Total	291495	282149	299535	301435

## Sheet: Sheet7
LHD Donor Seasonal distribution
Winter	Spring	Summer	Autumn
74	151	144	133
